# Supplementary material for: Translation and Validation of the SPICT-4All™ into the Sinhala language in the Sri Lankan healthcare context: SPICT-4All-SIN™
Source: Research Square preprint supplement (doi:10.21203/rs.3.rs-7092473/v1), 2025-08-14
Supplement: Supplementary file 1 [file 9f3e5779966883859c35ba15.docx]

**Chart 1: සහන සත්කාරය පිළිබඳ දර්ශකය (SPICT-4All™)**

| බරපතල සෞඛ්‍ය ගැටලු එකක් හෝ කිහිපයකින් පීඩා විඳින පුද්ගලයින් හඳුනාගැනීමට මෙම දර්ශකය යොදා ගනු ලබයි.  මෙවැනි පුද්ගලයින් හට උපකාර සහ රැකවරණය වඩාත් අවශ්‍ය වන අතර, ඔවුන් රැක බලා ගැනීම සඳහා ඉදිරි සැලැස්මක් ද අවශ්‍ය වේ. ඔවුන් පිළිබඳ ව පහත ප්‍රශ්න විමසා බලන්න. |
| --- |
| **එම පුද්ගලයා අයහපත් සෞඛ්‍ය තත්වයෙන් පෙලේ ද හෝ තත්වය නරක අතට හැරෙමින් පවතීද?** |
| හදිසි රෝහල්ගත වීමක් / වීම් |
| මෙම පුද්ගලයාගේ සෞඛ්‍ය අයහපත් වීම, බොහෝ විට අසනීප තත්වයෙන් සුවය නොලැබීම. (මෙයින් අදහස් වන්නේ එම පුද්ගලයාට එදිනෙදා වැඩකටයුතු ඉටු කර ගැනීම අසීරු බව සහ බොහෝ විට දිනයෙන් අඩක් පමණ ඇඳක හෝ පුටුවක රැඳී සිටින බවයි.) |
| උත්සන්න වන කායික මානසික සෞඛ්‍ය ගැටලු හේතුවෙන් ඔවුන් රැක බලා ගැනීමට අන් අයගේ උපකාර අවශ්‍ය වීම. |
| එම පුද්ගලයා රැක බලාගන්නා කෙනාට තවත් අයගේ උපකාර හා සහයෝගය අවශ්‍ය වීම. |
| පසුගිය මාස කිහිපය තුළ පැහැදිලිව ම බර අඩු වීම හෝ ශරීරය කෙට්ටුව පැවතීම. |
| සෞඛ්‍ය ගැටලුවලට නිසි ප්‍රතිකාර ලබා දුන්නත් රෝග ලක්ෂණ වලින් නිතර පීඩා විඳීම. |
| එම පුද්ගලයා (හෝ පවුලේ අය) සහන සත්කාර ඉල්ලා සිටීම; ප්‍රතිකාර සීමා කිරීමට, නතර කිරීමට හෝ ප්‍රතිකාර නොකර ම සිටීමට යොමු වීම හෝ ජීවිතයේ ගුණාත්මක භාවය කෙරෙහි අවධානය යොමු කිරීම. |
| එම පුද්ගලයාට පහත සඳහන් සෞඛ්‍ය ගැටලු එකක් හෝ තිබේ ද? |

| **හෘදයේ හෝ රුධිර සංසරණයේ ගැටලු** |
| --- |
| හෘදය අකර්මණ්‍ය වීම හෝ පපුවේ වේදනාකාරී තත්වයන් ඇතිවීම. විවේක ගන්නා විට, සුළු ක්‍රියාකාරකම් වලදී හෝ පියවර කිහිපයක් ඇවිදින විට හුස්ම ගැනීම අපහසු වීම. |
| පාද වල රුධිර සංසරණය ඉතා දුර්වල වීම හෝ සැත්කමක ට ලක් කිරීමට නොහැකි වීම. |
| පෙණහලු ආශ්‍රිත ගැටලු |
| දිගුකාලීන පෙණහලු ආබාධ ඇති වීම. හෘදයේ ආබාධයක් නොමැතිව ද, විවේක ගන්නා විට, සුළු ක්‍රියාකාරකම් වලදී හෝ පියවර කිහිපයක් ඇවිදින විට හුස්ම ගැනීමට අපහසු වීම |
| දිවා සහ රාත්‍රියේ වැඩි කාලයක් ඔක්සිජන් භාවිතා කිරීම ට අවශ්‍ය වීම. |
| රෝහලේ දී ශ්වසන යන්ත්‍රයකින් ප්‍රතිකාර ලබා දී තිබීම. |

| **පිළිකා රෝග‍ය** |
| --- |
| එදිනෙදා වැඩ කටයුතු කර ගැනීමේ හැකියාව අඩු වීම හෝ සෞඛ්‍ය තත්වය නරක අතට හැරෙමින් පැවතීම. |
| පිළිකා රෝගයට ප්‍රතිකාර කිරීම සඳහා සෞඛ්‍ය තත්වය ප්‍රමාණවත් නොවීම හෝ රෝග ලක්ෂණ සමනය ට පමණක් ප්‍රතිකාර ලබා දීම. |
| ඩිමෙන්ශියා තත්වය/ කායික මානසික දුර්වලතාව |
| තනිවම ඇඳුම් ඇඳීමට, ඇවිදීමට හෝ ආහාර ගැනීමට නොහැකි වීම.. |
| **ආහාර පාන අඩුවෙන් ගැනීම; ගිලීමේ අපහසුතාව.** |
| පාලනයකින් තොරව මුත්‍රා සහ මළ පහවීම. |
| කතා කර අදහස් දැක්වීම අපහසු වීම හෝ අනෙක් පුද්ගලයින්ට වැඩි ප්‍රතිචාරයක් නොදැක්වීම. |
| **නිතර වැටීම්; උකුල් ඇටය බිඳී තිබීම.** |
| **නිතර නියුමෝනියාව වැනි ආසාදන තත්ත්ව වලට ගොදුරු වීම.** |
| **ස්නායු පද්ධතිය ආශ්‍රිත ගැටලු (**උදා: පාකින්සන් රෝගය **(Parkinson’s disease),** මල්ටිපල් ස්ලෙරෝසිස් රෝගය **(multiple sclerosis),** ආඝාතය (stroke), මෝටර් නියුරෝන රෝගය **(motor neuron disease).** |
| කායික හා මානසික සෞඛ්‍යය දුර්වල වෙමින් පැවතීම. |
| කතා කිරීමේ, සන්නිවේදනය කිරීමේ ගැටළු හෝ ගිලීමේ අපහසුතා වැඩි වීම. |
| පපුවේ ආසාදන හෝ නියුමෝනියා තත්ව ඇතිවීම; හුස්ම ගැනීමේ අපහසුතා ඇතිවීම. |
| චලනය සිමා වන අන්දමේ දරුණු ආඝාත තත්ව (strokes) ඇතිවීම සහ වැඩිවන ආබාධිත තත්වය. |

| වකුගඩු ආශ්‍රිත ගැටලු |
| --- |
| වකුගඩු හොඳින් ක්‍රියා නොකිරීම, සාමාන්‍ය සෞඛ්‍යය දුර්වල වීම. |
| රුධිර කාන්දු පෙරණය (රුධිරයෙන් අපද්‍රව්‍ය ඉවත් කිරීම) නතර කිරීම හෝ නැතිනම් රෝගියා සහන සත්කාරය සඳහා යොමු කිරීම. |
| අක්මාව ආශ්‍රිත ගැටලු |
| පසුගිය වසර තුළ අක්මා ආශ්‍රිත ගැටලු උත්සන්න වී, පහත සඳහන් සංකුලතා හට ගෙන තිබීම:බඩේ වතුර පිරීමවිටෙක ඇතිවන මානසික ව්‍යාකූල තත්වය.වකුගඩු නිසි ලෙස ක්‍රියා නොකිරීමආසාදන වලට ගොදුරු වීම.ගලනාළයෙන් ලේ ගැලීම. | |
| අක්මා බද්ධයක් සිදුකල නොහැකි වීම. | |

| අනෙකුත් තත්වයන් |
| --- |
| සෞඛ්‍ය තත්වයෙන් දුර්වල පුද්ගලයන් සහ වෙනත් සෞඛ්‍ය ගැටලු හෝ සංකූලතා හේතුවෙන් මිය යා හැකි පුද්ගලයන්. රෝගයට ප්‍රතිකාර නොමැති වීම හෝ පවතින ප්‍රතිකාර වල අසාර්ථක බව. |
| මෙවන් පුද්ගලයෙකු හා ඔහුගේ පවුලේ අයට උපකාර වීමට අපට කළ හැක්කේ මොනවාද? |
| එම පුද්ගලයා හා ඔහුගේ පවුලේ අයගෙන් මේ මොහොතේ ඔවුන්ට අවශ්‍ය උපකාර ගැන විමසන්න. දැනට පවතින තත්වයන් වෙනස් වුවහොත්, ඉදිරි සත්කාර සඳහා සැලසුම් කිරීම වැදගත් වන්නේ ඇයි ද යන වග පහදා දෙන්න. |
| එම පුද්ගලයා සහ ඔහුගේ පවුලේ අයට සත්කාර සැලසුම් කිරීමට හෙදියක, වෛද්‍යවරයකු හෝ වෙනත් වෘත්තිකයෙකුගේ උපකාර සහ උපදෙස් ඉල්ලා සිටින්න. |
| අදාල පුද්ගලයාගේ ඖෂධ සහ වෙනත් ප්‍රතිකාර සලකා බලා, සුදුසුම සත්කාරය ඔවුන්ට ලැබෙන බව තහවුරු කරගන්න. ගැටලුව වඩා සංකීර්ණ හෝ කළමනාකරණය කිරීමට අපහසු නම්, ඒ පිළිබඳ විශේෂඥයෙකුගෙන් උපදෙස් පතන්න. |
| එම පුද්ගලයාට අනාගතයේ දී තීරණ ගැනීමේ හැකියාව නැතිව යාමට ඉඩ ඇති නම්, ඒ පිළිබඳ ව පෙර සුදානමක් සලසන්න. |
| එම පුද්ගලයාගේ සත්කාර පිළිබඳ ලිඛිත සැලැස්මක් සකසා ඒ ගැන දැන ගැනීමට අවශ්‍ය පුද්ගලයින්ට ලබා දෙන්න. එම සැලැස්ම අවශ්‍ය ඕනෑම වෙලාවක වෙනස් කිරීමට හැකියාව ඇත. |
